# Supplementary material for: Triptycene-based quinone molecules showing multi-electron redox reactions for large capacity and high energy organic cathode materials in Li-ion batteries
Source: Royal Society of Chemistry journal article supplement (doi:10.1039/c7ta09968a), 2018-01-01
Supplement: c7ta09968a1.pdf [file c7ta09968a1.pdf]

## Electronic Supplementary Information (ESI)

### **Triptycene-based Quinone Molecules Showing Multi-Electron Redox Reactions for a Large Capacity and High Energy Organic Cathode Material in Li-ion Battery**

Ji Eon Kwon,<sup>\*ab</sup> Chang-Seok Hyun,<sup>c</sup> Young Jun Ryu,<sup>c</sup> Joungphil Lee,<sup>d</sup> Dong Joo Min,<sup>a</sup> Moon Jeong Park,<sup>d</sup> Byeong-Kwan An,<sup>\*c</sup> and Soo Young Park<sup>\*ab</sup>

<sup>a</sup>Center for Supramolecular Optoelectronic Materials (CSOM), Department of Materials Science and Engineering, Seoul National University, 1 Gwanak-ro, Gwanak-gu, Seoul, 08826 Korea.

<sup>b</sup>Research Institute of Advanced Materials, Seoul National University, 1 Gwanak-ro, Gwanak-gu, Seoul, 08826 Korea.

<sup>c</sup>Department of Chemistry, Catholic University of Korea, 43 Jibong-ro, Bucheon, Gyeonggi-do, 14662 Korea.

<sup>d</sup>Department of Chemistry, Pohang University of Science and Technology (POSTECH), 77 Cheongam-ro, Nam-gu, Pohang, 37673 Korea.

## **Contents**

|                                                                                                                                                            |         |
|------------------------------------------------------------------------------------------------------------------------------------------------------------|---------|
| Materials preparation.....                                                                                                                                 | S3-S4   |
| Single crystal X-ray crystallography.....                                                                                                                  | S5-S6   |
| Table S1. X-ray data collection and structure refinements for TT.....                                                                                      | S7      |
| Table S2-S3. Electrochemical properties of BQ, TM, and TT in acetonitrile solution.....                                                                    | S8-9    |
| Table S4. Battery performance of the triptycene quinone electrodes.....                                                                                    | S10     |
| Figure S1-S2. Single crystal structure of TT.....                                                                                                          | S11-S12 |
| Figure S3. Cyclic voltammetry of BQ, TM, and TT.....                                                                                                       | S13     |
| Figure S4-S5. Relative energies and HOMO orbital diagrams of the reduced forms.....                                                                        | S14-S15 |
| Figure S6. Representative capacity-voltage profiles of TM and TT electrodes at 0.1 C-rate.....                                                             | S16     |
| Figure S7. The Capacity-voltage profiles of TT and Super-P electrodes between 0.5–3.5 V vs Li/Li+.....                                                     | S17     |
| Figure S8. Cycle performance and representative capacity-voltage profiles of BQ electrodes at 0.1 C-rate...                                                | S18     |
| Figure S9. Representative capacity-voltage profiles and cycle performance of TT electrodes at 0.2 C-rate in the composite polymer electrolytes (CPEs)..... | S19     |
| Figure S10. (a) FT-IR and (b) XRD spectra of TT, CMK3, and TT-CMK3 composites.....                                                                         | S20     |
| Figure S11-12. FE-SEM images of TT, CMK3, and TT-CMK3 composites.....                                                                                      | S21-22  |
| Figure S13. Representative capacity-voltage profiles of TT and TT-CMK3 electrodes at 1 C-rate.....                                                         | S23     |
| Figure S14. Representative capacity-voltage profiles of TT and TT-CMK3 electrodes at various C-rate....                                                    | S24     |
| Figure S15. Specific energy of TT and TT-CMK3 electrodes at various C-rate.....                                                                            | S25     |
| Optimized geometries by DFT calculation.....                                                                                                               | S26-38  |

## Materials preparation

All reagents and materials were obtained from commercial suppliers and used without further purification unless otherwise noted. All glassware, syringes, magnetic stirring bars, and needles were thoroughly dried in a convection oven. Reactions were monitored using thin layer chromatography (TLC) with commercial TLC plates (silica gel 60 F254, Merck Co.). 9,10-Dihydro-9,10-o-benzoanthracene-1,4-dione (tritycene monobenzoquinone, TM) and 9,10-dihydro-9,10-o-Benzoanthracene-1,4,5,8,13,16-hexone (tritycene tribenzoquinone, TT) were prepared according to the reported procedures.<sup>S1</sup> <sup>1</sup>H-NMR spectra were recorded on a Bruker Ascend 500 spectrometer. ATR/FT-IR spectra were recorded on a Bruker TENSOR II. Mass spectra were acquired through the JEOL JMS-700 instrument.

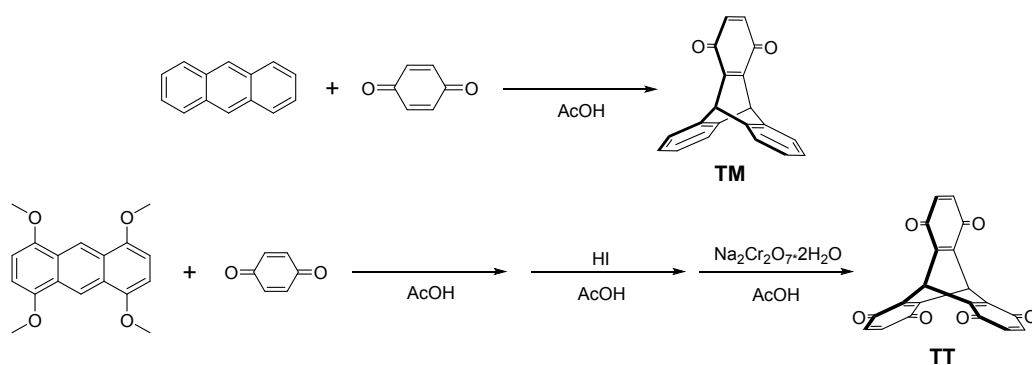

**Scheme S1.** Synthetic route of TM and TT.

### **9,10-Dihydro-9,10-o-benzoanthracene-1,4-dione (tritycene monobenzoquinone, TM).**

A mixture of anthracene (10.00 g, 56.1 mmol) and *p*-benzoquinone (21.23 g, 196.4 mmol) in acetic acid (500 mL) was stirred at 120 °C for 3 h. The reaction mixture was poured into water, and then the precipitate was filtered, washed with hot water. The crude product was purified by flash chromatography on silica gel using dichloromethane as an eluent (11.17 g, 70 %). <sup>1</sup>H-NMR (500 MHz,  $\text{CDCl}_3$ )  $\delta$ (ppm) 7.44–7.42 (m, 4H), 7.05–7.03 (m, 4H), 6.60 (s, 2H), 5.80 (s, 2H); IR ( $\nu$ ,  $\text{cm}^{-1}$ ) 1650 (C=O stretching); MS (EI)  $m/z$ : calcd for  $\text{C}_{20}\text{H}_8\text{O}_6$  284.08, found 284.00 (M)<sup>+</sup>.

**9,10-dihydro-9,10-o-Benzoanthracene-1,4,5,8,13,16-hexone (tritycene tribenzoquinone, TT).** The compound TT was prepared by the following three steps. (Step 1)

A mixture of 1,4,5,8-tetramethoxyanthracene<sup>S2</sup> (1.26 g, 4.25 mmol) and 1,4-benzoquinone (2.28 g, 21 mmol) in acetic acid (130 mL) was refluxed for 48 h. The resulting mixture was cooled, filtrated, and washed with *N,N*-dimethylformamide (DMF) and acetone to give red powders (1.4 g). (Step 2) The resulting powders (1.4g) were then dissolved in HI (40 mL) and acetic acid (100 mL) and refluxed for 8 h. The reaction mixture was cooled, filtrated, and washed with acetone to give a grey solid (1.3 g). (Step 3) 0.87 g of the solid obtained in the step 2 was stirred with sodium dichromate dihydrate (0.75 g, 2.5 mmol) in acetic acid for 2h. The reaction mixture was poured into water and neutralized with an aqueous NaHCO<sub>3</sub> solution. The neutralized solution was then extracted with dichloromethane, and the organic layer was dried over anhydrous MgSO<sub>4</sub>. After removal of the solvent, the product was purified by flash chromatography on silica gel using ethyl acetate: dichloromethane (1:30) as an eluent (0.73 g). <sup>1</sup>H-NMR (500 MHz, CDCl<sub>3</sub>) δ(ppm) 6.70 (s, 6H), 6.60 (s, 2H); IR (ν, cm<sup>-1</sup>) 1650 (C=O stretching); MS (EI) m/z: calcd for C<sub>20</sub>H<sub>8</sub>O<sub>6</sub> 344.03, found 344.00 (M)<sup>+</sup>.

## Single crystal X-ray crystallography

**Data Collection.** A crystal with approximate dimensions  $0.1 \times 0.15 \times 0.2 \text{ mm}^3$  was selected under oil at ambient conditions and attached to the tip of a MiTeGen MicroMount<sup>®</sup>. The crystal was mounted and centered in the X-ray beam by using a video camera.

The crystal evaluation and data collection were performed on a Bruker D8 Venture diffractometer with Mo  $K_\alpha$  ( $\lambda = 0.71073 \text{ \AA}$ ) radiation and the diffractometer to crystal distance of 4.00 cm.

The initial cell constants were obtained from three series of  $\omega$  scans at different starting angles. Each series consisted of 12 frames collected at intervals of  $0.5^\circ$  in  $6^\circ$  range about  $\omega$  with the exposure time of 5 seconds per frame. The reflections were successfully indexed by an automated indexing routine built in the APEXII program. The final cell constants were calculated from a set of 4244 strong reflections from the actual data collection.

The data were collected by using the full sphere data collection routine to survey the reciprocal space to the extent of a full sphere to a resolution of  $0.81 \text{ \AA}$ . A total of 10224 were harvested by collecting 7 set of frames with  $0.5^\circ$  scans in  $\omega$  and  $\phi$  with an exposure time 5 sec per frame. These highly redundant datasets were corrected for Lorentz and polarization effects. The absorption correction was based on fitting a function to the empirical transmission surface as sampled by multiple equivalent measurements.<sup>S3</sup>

**Structure Solution and Refinement.** The systematic absences in the diffraction data were uniquely consistent for tetragonal, space group  $I4_1md$  that yielded chemically reasonable and computationally stable results of refinement.<sup>S4-S5</sup>

A successful solution by the direct methods provided most non-hydrogen atoms from the  $E$ -map. The remaining non-hydrogen atoms were located in an alternating series of least-squares cycles and difference Fourier maps. All non-hydrogen atoms were refined with anisotropic displacement coefficients. All hydrogen atoms were included in the structure factor calculation at idealized positions and were allowed to ride on the neighboring atoms with relative isotropic displacement coefficients.

The final least-squares refinement of 67 parameters against 1006 data resulted in

residuals  $R$  (based on  $F^2$  for  $I \geq 2\sigma$ ) and  $wR$  (based on  $F^2$  for all data) of 0.0394 and 0.0942 respectively. The final difference Fourier map was featureless.

**Crystal Data for C<sub>20</sub>H<sub>8</sub>O<sub>6</sub> ( $M=344.26$  g/mol):** tetragonal, space group  $I4_1md$  (no. 109),  $a = 10.8498(4)$  Å,  $c = 12.7484(5)$  Å,  $V = 1500.72(13)$  Å<sup>3</sup>,  $Z = 4$ ,  $T = 304.5$  K,  $\mu(\text{MoK}\alpha) = 0.115$  mm<sup>-1</sup>,  $D_{\text{calc}} = 1.524$  g/cm<sup>3</sup>, 10224 reflections measured ( $4.93^\circ \leq 2\Theta \leq 56.472^\circ$ ), 1006 unique ( $R_{\text{int}} = 0.0515$ ,  $R_{\text{sigma}} = 0.0273$ ) which were used in all calculations. The final  $R_1$  was 0.0394 ( $I > 2\sigma(I)$ ) and  $wR_2$  was 0.0942 (all data). Crystallographic data for the structure has been deposited with the Cambridge Crystallographic Data Centre, CCDC No. 1574417, and can be obtained free of charge via <http://www.ccdc.cam.ac.uk/structures/>.

## References

- S1. Zhu, X. Z.; Chen, C. F. Iptycene quinones: Synthesis and structure. *J. Org. Chem.* **2005**, *70*, 917-924.
- S2. Quast H.; Fuchabauer, H. –L. *Chem. Ber.* (1986) **119**, 1016-1038.
- S3. Bruker-AXS. (2007-2013) APEX2 (Ver. 2013.2-0), SADABS (2012-1), and SAINT+ (Ver. 8.30C) Software Reference Manuals. Bruker-AXS, Madison, Wisconsin, USA.
- S4. Sheldrick, G. M. SHELXL. *Acta. Cryst.* **2008**, *A64*, 112-122.
- S5. Dolomanov, O.V.; Bourhis, L.J.; Gildea, R.J.; Howard, J.A.K.; Puschmann, H. OLEX2: a complete structure solution, refinement and analysis program. *J. Appl. Cryst.* **2009**, *42*, 339-341.

**Table S1.** X-ray data collection and structure refinements for TT.

|                                   |                                                        |            |
|-----------------------------------|--------------------------------------------------------|------------|
| Empirical formula                 | C <sub>20</sub> H <sub>8</sub> O <sub>6</sub>          |            |
| Formula weight                    | 344.26                                                 |            |
| Temperature (K)                   | 304.5                                                  |            |
| Wavelength                        | $\lambda=0.71073$<br>(Mo K $\alpha$ )                  |            |
| Crystal system                    | Tetragonal                                             |            |
| Space group                       | I4 <sub>1</sub> md                                     |            |
| Unit cell dimensions              | a/Å                                                    | 10.8498(4) |
|                                   | b/Å                                                    | 10.8498(4) |
|                                   | c/Å                                                    | 12.7484(5) |
|                                   | $\alpha$ /°                                            | 90         |
|                                   | $\beta$ /°                                             | 90         |
|                                   | $\gamma$ /°                                            | 90         |
| Volume (Å <sup>3</sup> )          | 1500.72(13)                                            |            |
| Z                                 | 4                                                      |            |
| Density (calculated)              | 1.524                                                  |            |
| Absorption coefficient            | 0.115                                                  |            |
| Reflections collected             | 10224                                                  |            |
| Independent reflections           | 1006                                                   |            |
|                                   | [R <sub>int</sub> =0.0515, R <sub>sigma</sub> =0.0273] |            |
| Data / restraints / parameters    | 1006/1/67                                              |            |
| Goodness-of-fit on F <sup>2</sup> | 1.080                                                  |            |
| Final R indices [I > 2sigma(I)]   | R <sub>1</sub> = 0.0394, wR <sub>2</sub> = 0.0875      |            |
| R indices (all data)              | R <sub>1</sub> = 0.0544, wR <sub>2</sub> = 0.0942      |            |

**Table S2.** Electrochemical properties from the cyclic voltammetry (CV) measurement of BQ, TM, and TT in acetonitrile solution.

| Compound | $E_{\text{red1}}^{\text{a)}}$ |                     |               | $E_{\text{red2}}^{\text{a)}}$ |                     |               |
|----------|-------------------------------|---------------------|---------------|-------------------------------|---------------------|---------------|
|          | $E_{\text{pc}}$ (V)           | $E_{\text{pa}}$ (V) | $E_{1/2}$ (V) | $E_{\text{pc}}$ (V)           | $E_{\text{pa}}$ (V) | $E_{1/2}$ (V) |
| BQ       | -0.93                         | -0.64               | -0.79         | -1.58                         | -1.28               | -1.43         |
| TM       | -0.84                         | -0.61               | -0.73         | -1.52                         | -1.28               | -1.40         |
| TT       | -0.69                         | -0.43               | -0.56         | -                             | -1.24               | -             |
|          | -0.88                         | -0.61               | -0.75         | -1.72                         | -                   | -             |
|          | -1.03                         | -0.78               | -0.90         | -                             | -                   | -             |

a) Voltage values are presented vs. Ag/Ag<sup>+</sup>.



**Table S3.** Electrochemical properties from the differential pulse voltammetry (DPV) measurement of BQ, TM, and TT in acetonitrile solution.

| Compound | $E_{\text{red1}}^{\text{a)}} \text{ (V)}$ | $E_{\text{red2}}^{\text{a)}} \text{ (V)}$ |
|----------|-------------------------------------------|-------------------------------------------|
| BQ       | -0.81 (2.76)                              | -1.49 (2.08)                              |
| TM       | -0.74 (2.83)                              | -1.48 (2.09)                              |
| TT       | -0.58 (2.99)                              | -1.44 (2.13)                              |
|          | -0.77 (2.80)                              | -1.59 (1.98)                              |
|          | -0.94 (2.63)                              |                                           |

a) Voltage values are presented vs. Ag/Ag<sup>+</sup>. Voltage values in parentheses are presented vs. Li/Li<sup>+</sup>.

**Table S4.** Battery performance of the triptycene quinone electrodes.

| Compound   | Maximum specific capacity at 1 C (mAh/g) | Specific capacity after 100 cycles at 1 C (mAh/g) | Retention (%) | Specific capacity at various C-rate <sup>a</sup> (mAh/g) |
|------------|------------------------------------------|---------------------------------------------------|---------------|----------------------------------------------------------|
| TT         | 347                                      | 37                                                | 11            | 393 (0.1 C)<br>337 (0.2 C)<br>294 (0.5 C)<br>263 (1 C)   |
| TT-CMK3-11 | 340                                      | 111                                               | 33            | -                                                        |
| TT-CMK3-23 | 252                                      | 207                                               | 82            | 319 (0.1 C)<br>275 (0.2 C)<br>242 (0.5 C)<br>223 (1 C)   |
| TT-CMK3-12 | 294                                      | 224                                               | 76            | 366 (0.1 C)<br>307 (0.2 C)<br>279 (0.5 C)<br>262 (1 C)   |

a) Values in the parentheses indicate the current rate.

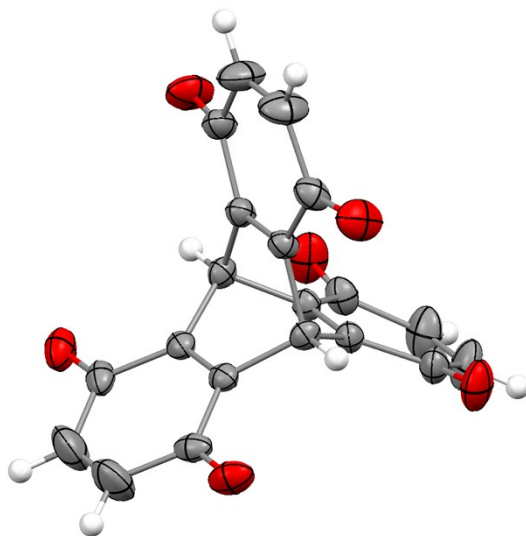

**Figure S1.** Single crystal structure of TT. Thermal ellipsoids are shown at 50% probability.

The gray, red, and white colored atoms indicate carbon, oxygen, and hydrogen, respectively.

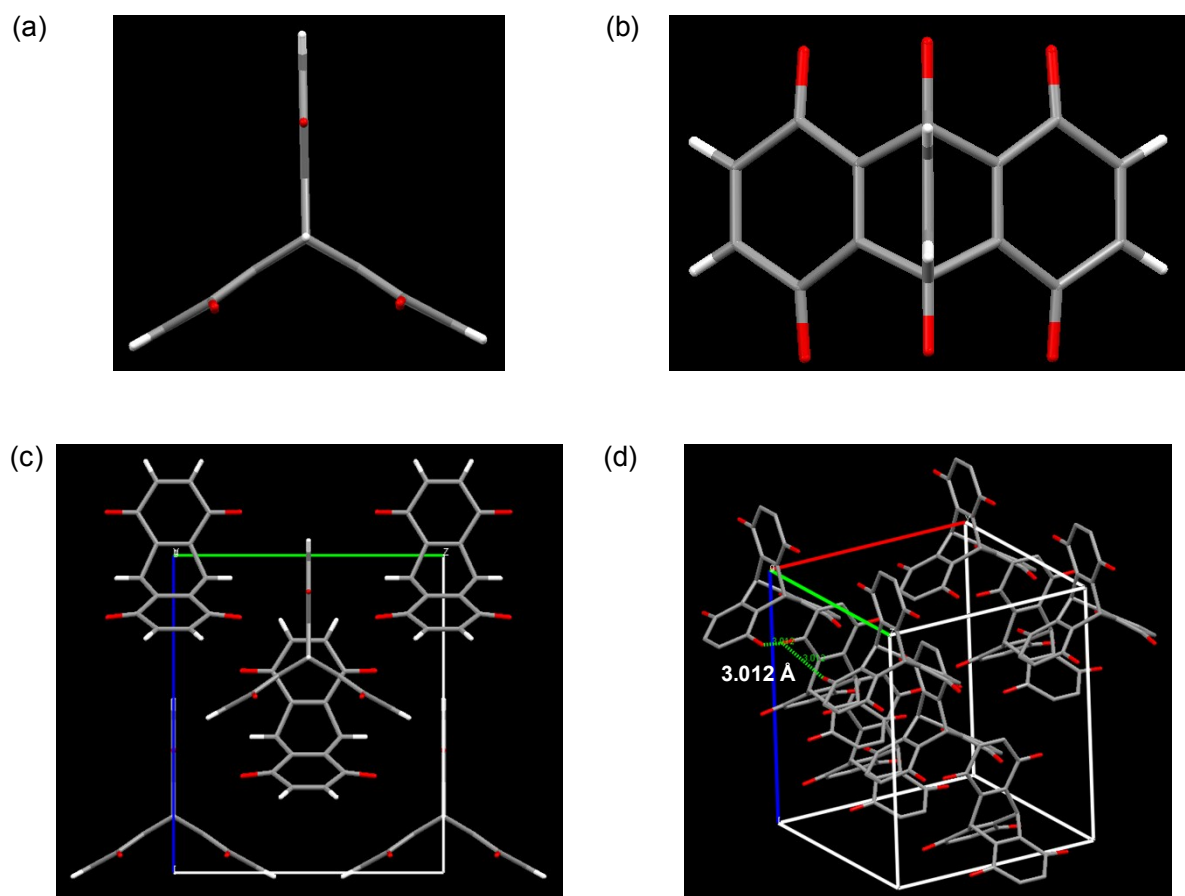

**Figure S2.** Single crystal structure of TT: (a) Side view and (b) top view of the molecule. Molecular packing structures of the TT single crystal: (c) along the *a* axis and (d) side view.

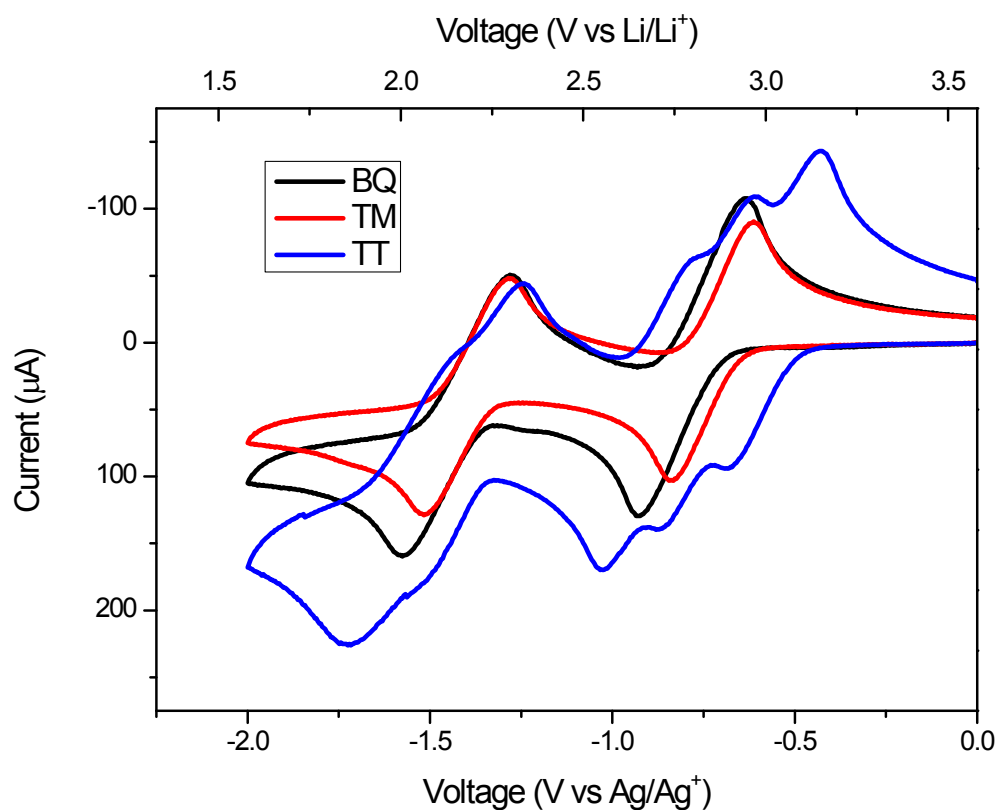

**Figure S3.** Cyclic voltammetry of BQ, TM, and TT with 0.1 M tetrabutylammonium hexafluorophosphate as a supporting electrolyte in acetonitrile. The potential values are linearly rescaled with respect to Li/Li<sup>+</sup> from the measured value vs. Ag/AgNO<sub>3</sub> reference electrode ( $\text{Fc}/\text{Fc}^+ = 0.13 \text{ V vs. Ag}/\text{Ag}^+$ ).

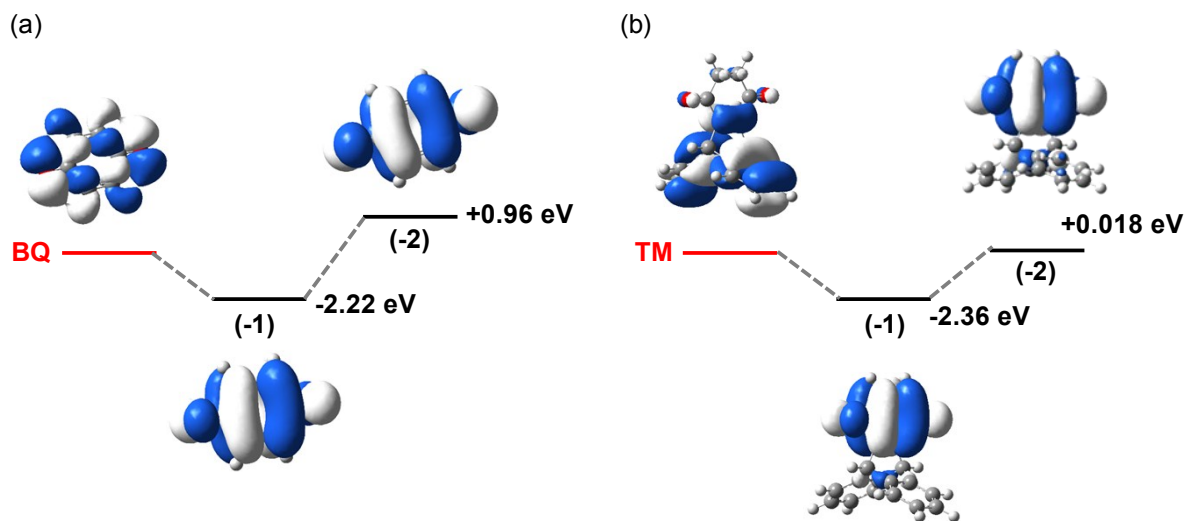

**Figure S4.** Relative energies and HOMO orbital diagrams of the reduced forms of (a) BQ and (b) TM.

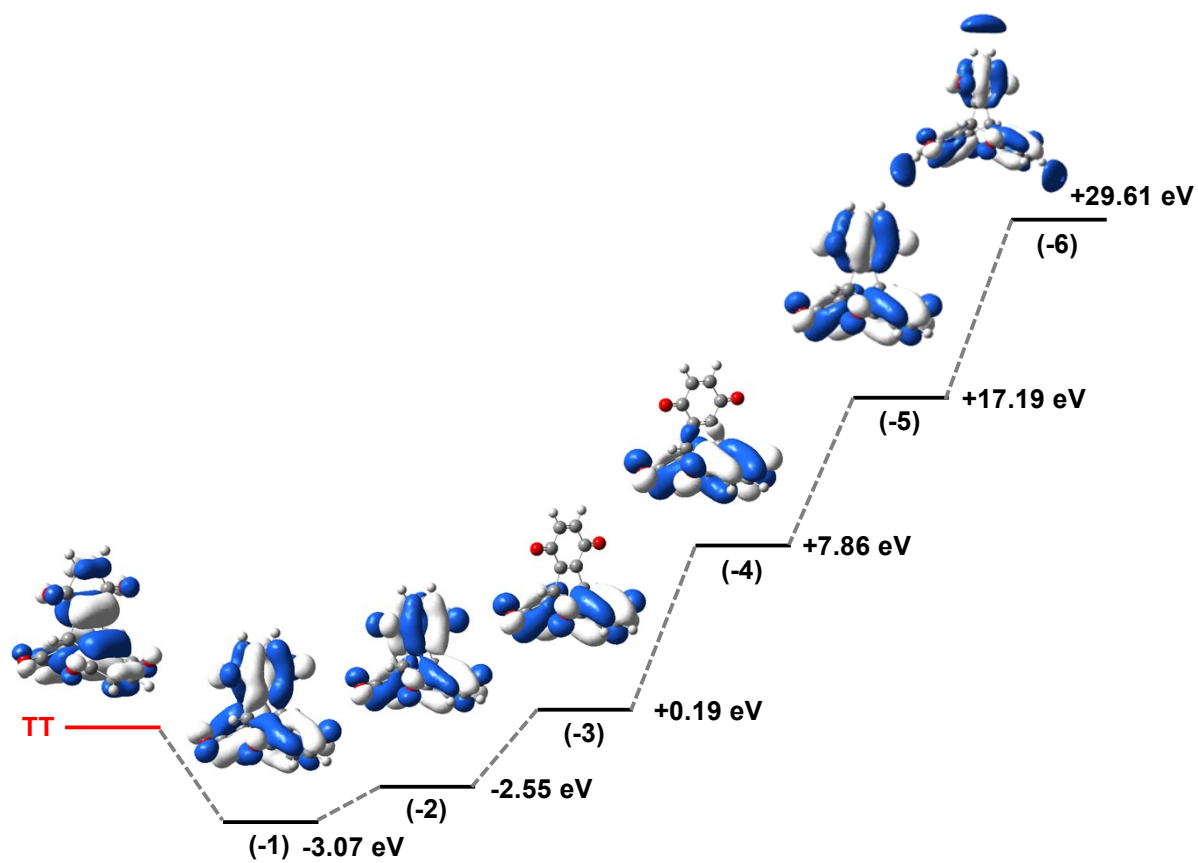

**Figure S5.** Relative energies and HOMO orbital diagrams of the reduced forms of TT.

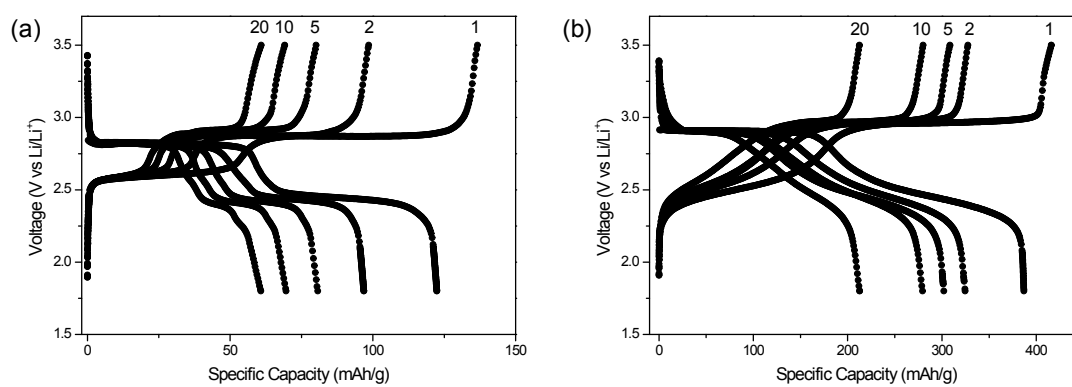

**Figure S6.** Representative capacity-voltage profiles of (a) TM and (b) TT electrodes at 0.1 C-rate. The numbers in the graphs indicate cycle numbers.



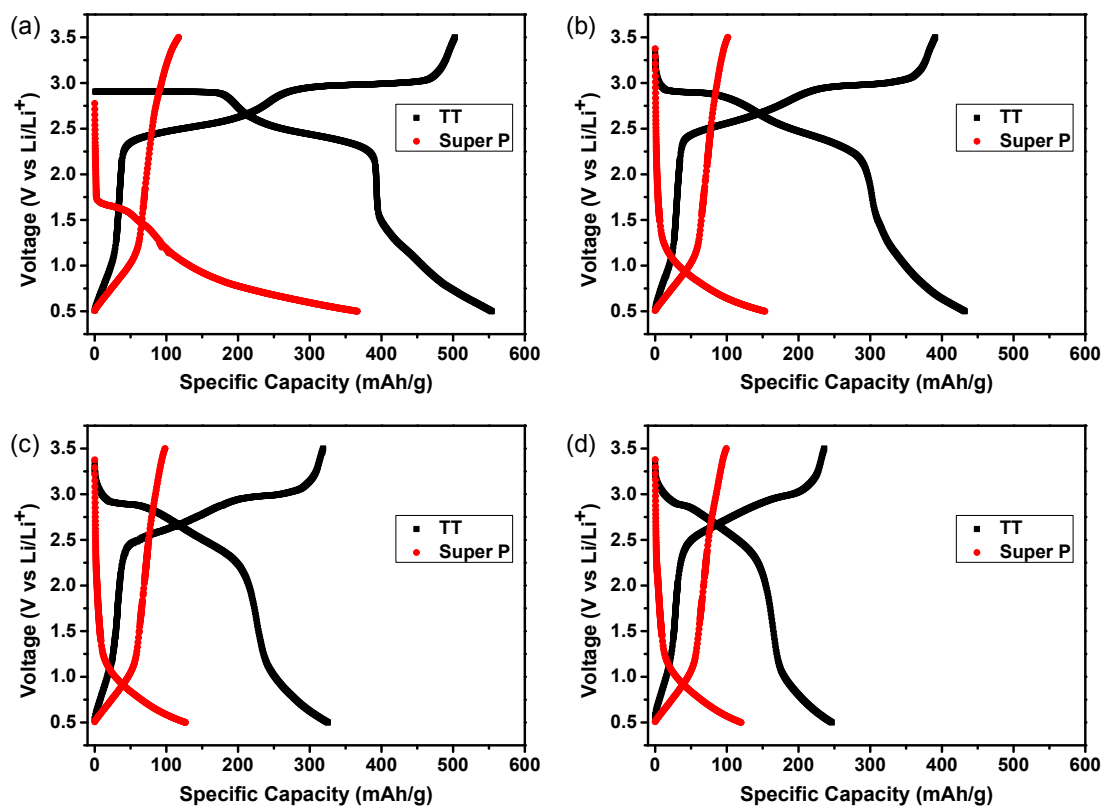

**Figure S7.** The Capacity-voltage profiles of TT and Super-P electrodes between 0.5–3.5 V vs Li/Li<sup>+</sup> at (a) 1st, (b) 2nd, (c) 5th, and (d) 10th cycle.

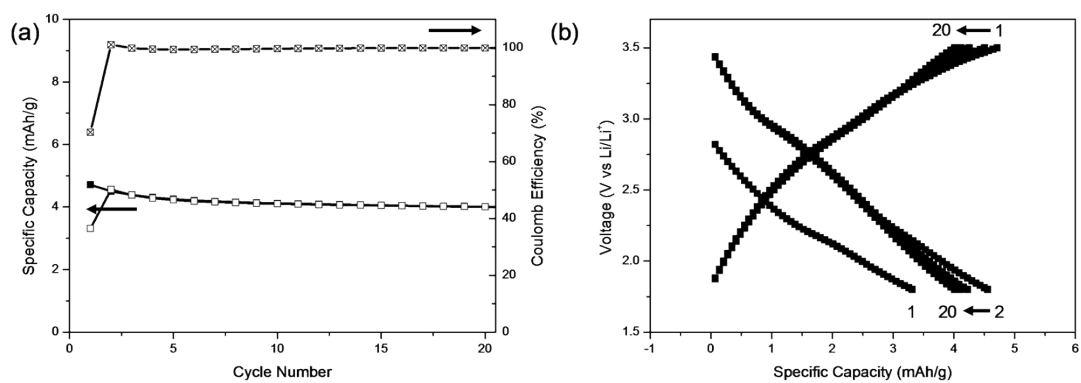

**Figure S8.** (a) Cycle performance and (b) representative capacity-voltage profiles of the BQ electrode at 0.1 C-rate. The numbers in the graphs indicate cycle numbers.

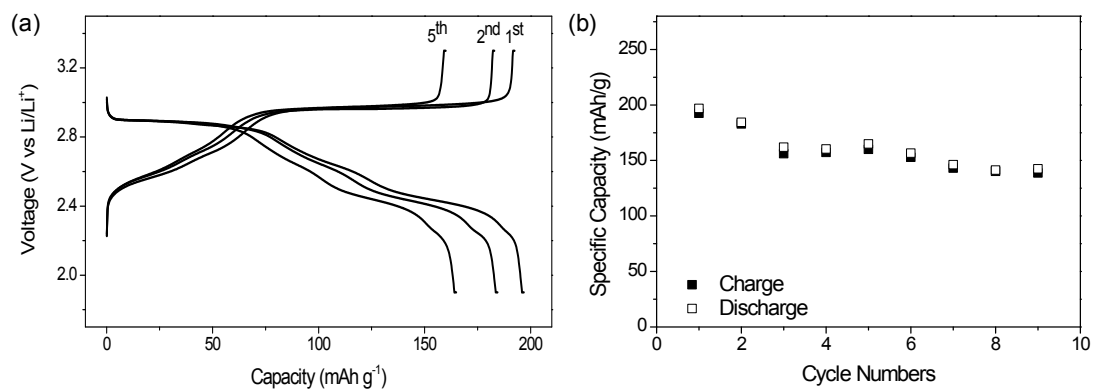

**Figure S9.** (a) Representative capacity-voltage profiles and (b) cycle performance of TT electrodes at 0.2 C-rate in the composite polymer electrolyte (CPE). The numbers in the graphs indicate cycle numbers.

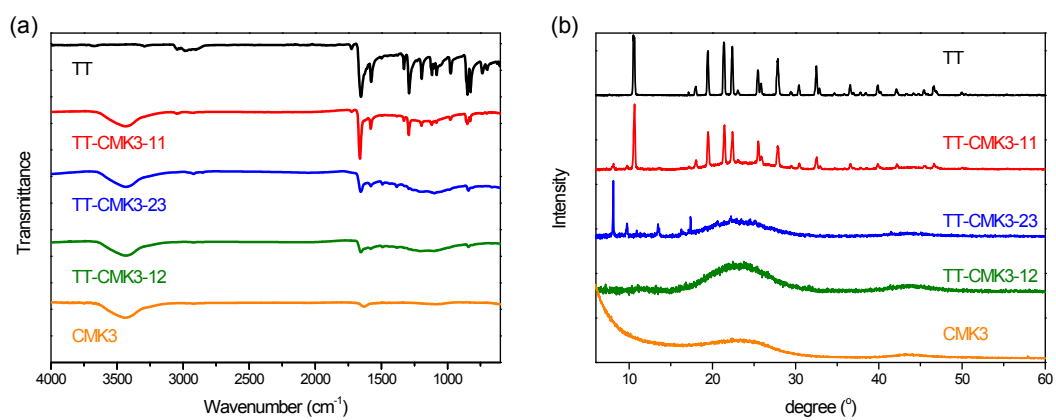

**Figure S10.** (a) FT-IR and (b) XRD spectra of TT, TT-CMK3 composites with different mixing ratio, and CMK3.

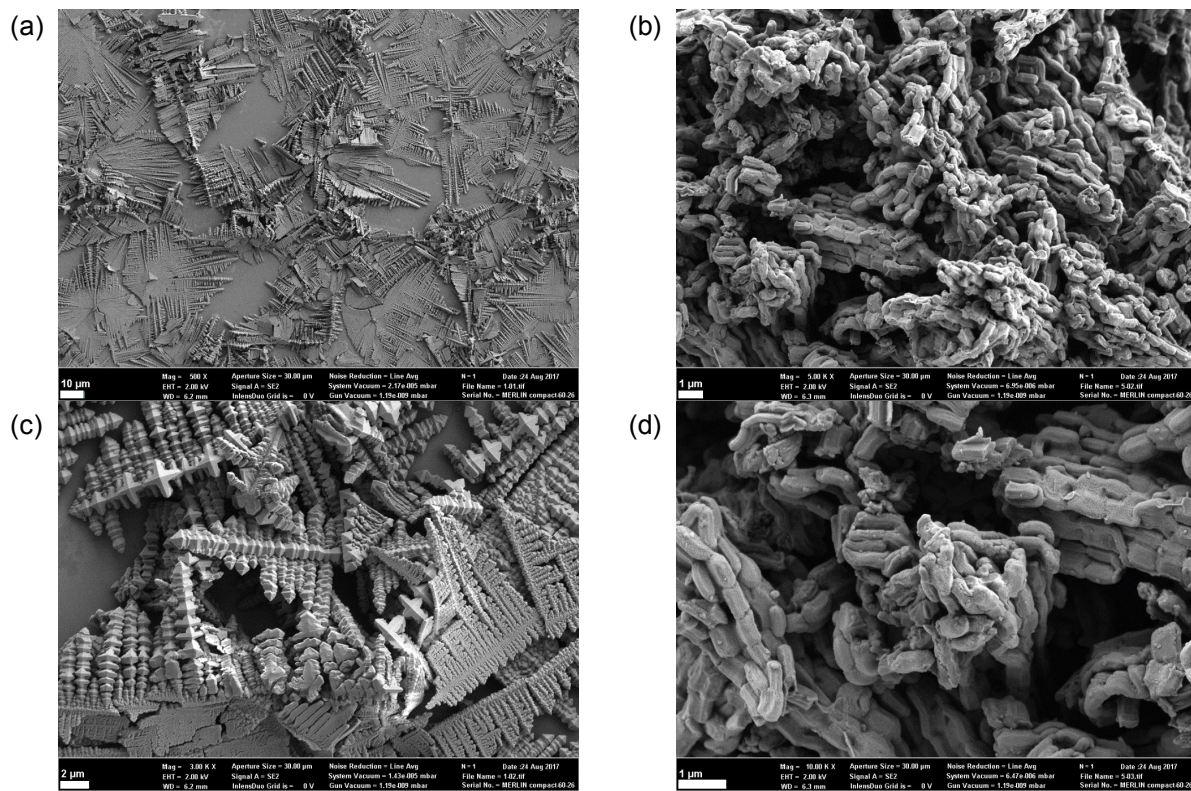

**Figure S11.** FE-SEM images of (a, c) TT and (b, d) CMK-3.

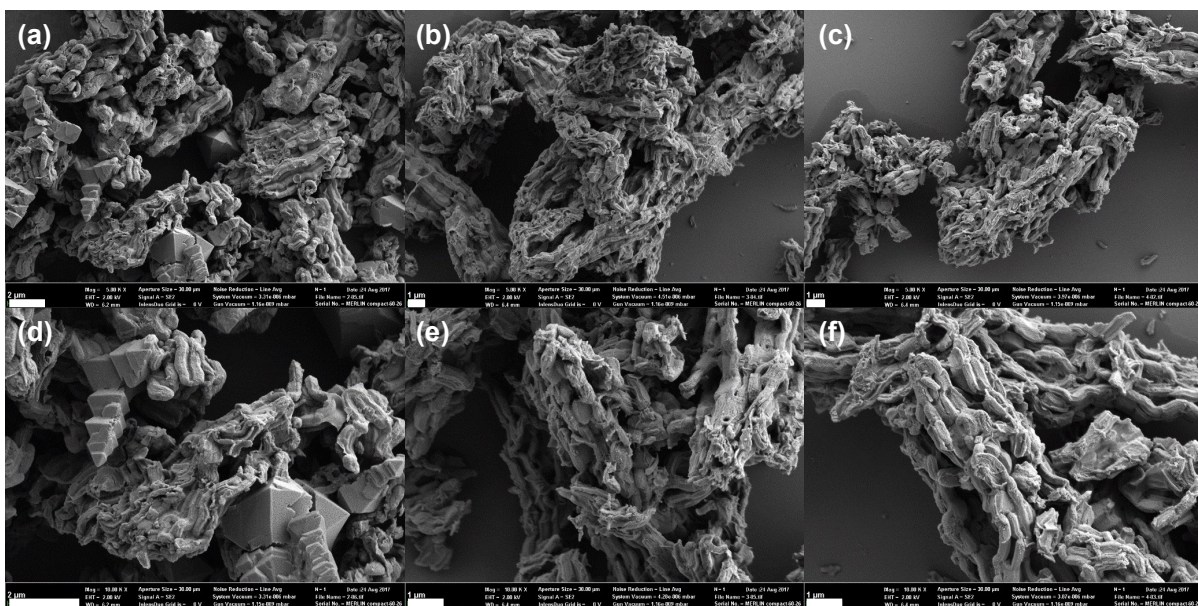

**Figure S12.** FE-SEM images of (a, d) TT-CMK3-11, (b, e) TT-CMK3-23, and (c,f) TT-CMK3-12 composites.

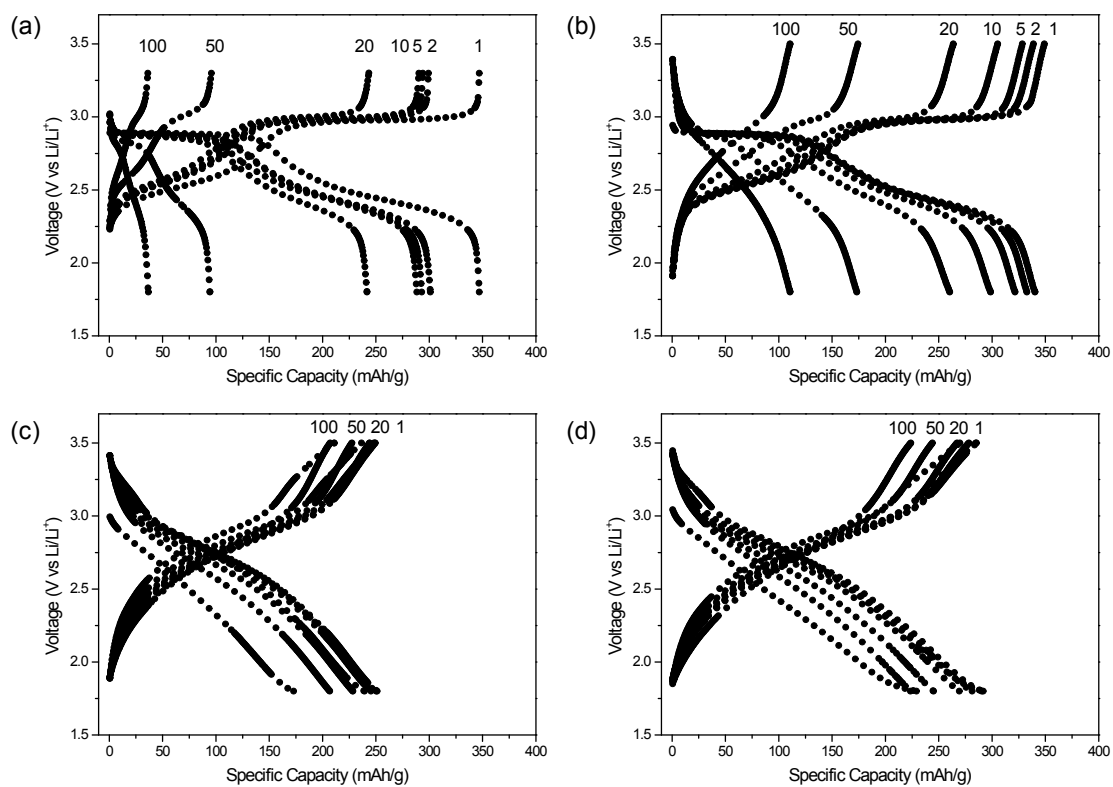

**Figure S13.** Representative capacity-voltage profiles of (a) TT, (b) TT-CMK3-11, (c) TT-CMK3-23, and (d) TT-CMK3-12 electrodes at 1 C-rate. The numbers in the graphs indicate cycle numbers.

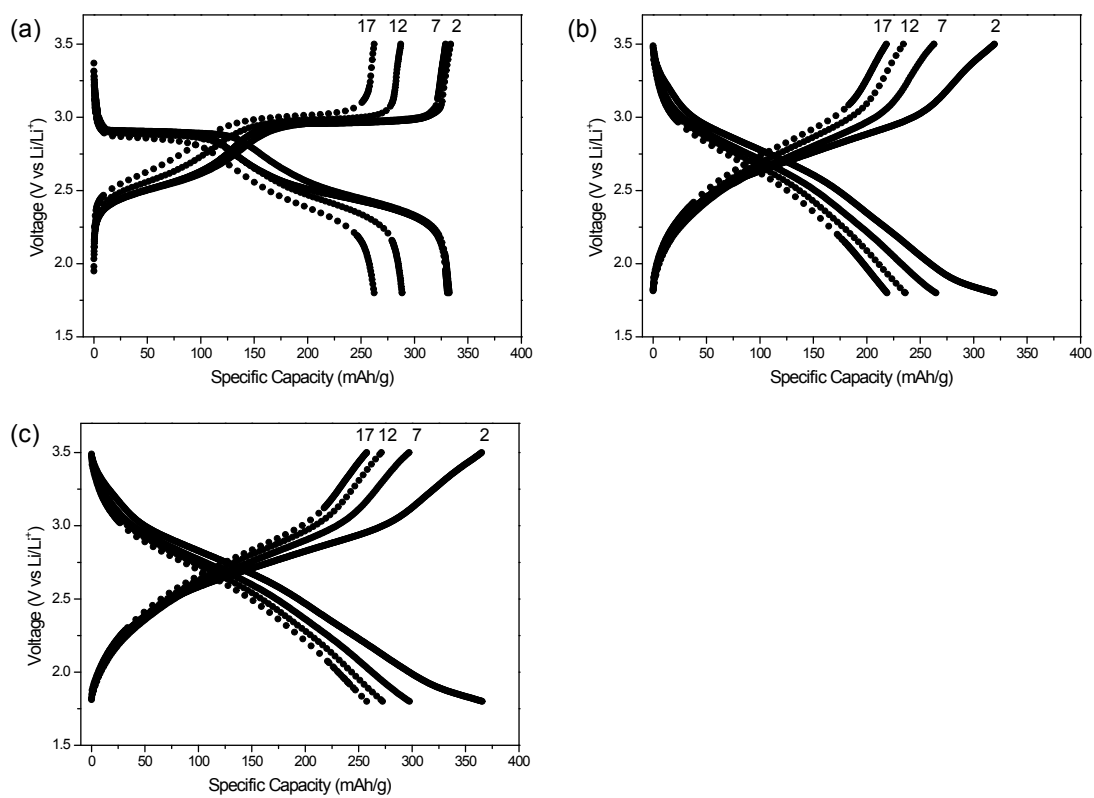

**Figure S14.** Representative capacity-voltage profiles of (a) TT, (b) TT-CMK3-23, and (c) TT-CMK3-12 electrodes at various C-rate. The numbers in the graphs indicate cycle numbers.



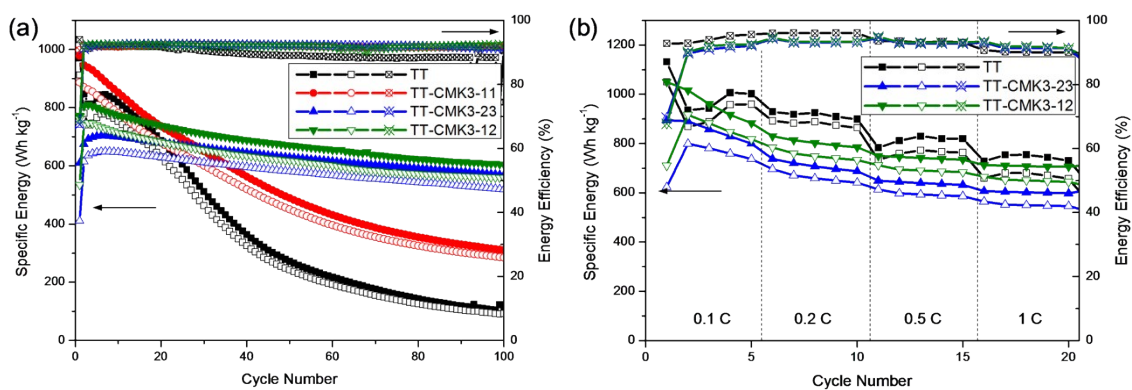

**Figure S15.** Specific energy with the corresponding energy efficiencies of TT (black squares), TT-CMK3-11 (red circles), TT-CMK3-23 (blue up-pointing triangles) and TT-CMK3-12 (green down-pointing triangles) composite electrodes at (a) 1 C-rate and (b) various C-rate. The symbols with an x mark in (a) and (b) indicate the energy efficiency respectively.

## Optimized geometries by DFT calculation

**BQ**

E = -381.47650238 hartrees

| Symbol | X          | Y          | Z          |
|--------|------------|------------|------------|
| C      | 0.6723350  | -1.2707760 | 0.0000700  |
| C      | -0.6723420 | -1.2707780 | 0.0000810  |
| C      | -1.4436190 | -0.0000070 | 0.0000270  |
| C      | -0.6723350 | 1.2707850  | 0.0000780  |
| C      | 0.6723400  | 1.2707840  | 0.0000730  |
| C      | 1.4436180  | -0.0000020 | 0.0000530  |
| H      | 1.2587550  | -2.1851020 | 0.0000840  |
| H      | -1.2587570 | -2.1851070 | 0.0001350  |
| H      | -1.2587720 | 2.1851000  | 0.0001220  |
| H      | 1.2587730  | 2.1851030  | 0.0000950  |
| O      | -2.6706720 | 0.0000020  | -0.0001690 |
| O      | 2.6706750  | -0.0000060 | -0.0001720 |

**BQ<sup>-</sup>**

E = -381.55622438 hartrees

| Symbol | X          | Y          | Z          |
|--------|------------|------------|------------|
| C      | 0.6874430  | -1.2247660 | 0.0000070  |
| C      | -0.6874430 | -1.2247660 | -0.0000060 |
| C      | -1.4672830 | 0.0000000  | -0.0000390 |
| C      | -0.6874430 | 1.2247660  | -0.0000060 |
| C      | 0.6874430  | 1.2247660  | 0.0000070  |
| C      | 1.4672830  | 0.0000000  | 0.0000110  |
| H      | 1.2482660  | -2.1581740 | 0.0000190  |
| H      | -1.2482660 | -2.1581740 | 0.0000000  |
| H      | -1.2482670 | 2.1581740  | 0.0000000  |
| H      | 1.2482670  | 2.1581740  | 0.0000190  |
| O      | -2.7397670 | 0.0000000  | 0.0000210  |
| O      | 2.7397670  | 0.0000000  | -0.0000060 |

**BQ<sup>2-</sup>**

E = -381.43718070 hartrees

| Symbol | X          | Y          | Z          |
|--------|------------|------------|------------|
| C      | -0.0000010 | 0.7046460  | 1.1899160  |
| C      | -0.0000010 | -0.7046460 | 1.1899160  |
| C      | -0.0000400 | -1.5051820 | 0.0000000  |
| C      | -0.0000010 | -0.7046460 | -1.1899160 |
| C      | -0.0000010 | 0.7046460  | -1.1899160 |
| C      | -0.0000330 | 1.5051820  | 0.0000000  |
| H      | 0.0000240  | 1.2402990  | 2.1450400  |
| H      | 0.0000250  | -1.2402990 | 2.1450400  |
| H      | 0.0000250  | -1.2402990 | -2.1450400 |
| H      | 0.0000240  | 1.2402990  | -2.1450400 |
| O      | 0.0000320  | -2.8203790 | 0.0000000  |
| O      | 0.0000130  | 2.8203790  | 0.0000000  |

**TM**

E = -919.82976194 hartrees

| Symbol | X          | Y          | Z          |
|--------|------------|------------|------------|
| C      | 2.3946890  | 0.0004410  | -1.4549280 |
| C      | 1.1377330  | 0.0002180  | -0.6762950 |
| C      | 1.1377340  | 0.0002180  | 0.6762950  |
| C      | 2.3946890  | 0.0004440  | 1.4549280  |
| C      | 3.6634330  | 0.0004010  | 0.6721200  |
| C      | 3.6634330  | 0.0004010  | -0.6721200 |
| C      | -0.2523740 | -0.0000050 | -1.2989160 |
| C      | -0.2523740 | -0.0000060 | 1.2989160  |
| C      | -1.5758550 | 2.2517400  | -1.4078800 |
| C      | -2.1930670 | 3.2934210  | -0.6978280 |
| C      | -2.1930670 | 3.2934210  | 0.6978290  |
| C      | -1.5758550 | 2.2517390  | 1.4078810  |
| C      | -0.9649600 | 1.2213710  | 0.7025640  |
| C      | -0.9649590 | 1.2213720  | -0.7025630 |
| C      | -1.5751470 | -2.2521640 | -1.4078800 |
| C      | -2.1920240 | -3.2940440 | -0.6978290 |
| C      | -2.1920240 | -3.2940440 | 0.6978280  |
| C      | -1.5751460 | -2.2521650 | 1.4078800  |
| C      | -0.9645710 | -1.2216060 | 0.7025630  |
| C      | -0.9645710 | -1.2216060 | -0.7025640 |
| O      | 2.4079440  | 0.0002710  | -2.6833430 |
| O      | 2.4079440  | 0.0002670  | 2.6833430  |
| H      | 4.5789960  | 0.0003920  | 1.2564980  |
| H      | 4.5789950  | 0.0003920  | -1.2564980 |
| H      | -0.2216410 | 0.0000020  | -2.3886350 |
| H      | -0.2216410 | 0.0000010  | 2.3886350  |
| H      | -2.6709560 | 4.1041450  | -1.2398920 |
| H      | -2.6709560 | 4.1041440  | 1.2398940  |
| H      | -2.6696580 | -4.1049180 | -1.2398930 |
| H      | -2.6696580 | -4.1049180 | 1.2398920  |
| H      | -1.5740720 | 2.2524870  | -2.4945980 |
| H      | -1.5740720 | 2.2524860  | 2.4945990  |
| H      | -1.5733750 | -2.2529020 | -2.4945990 |
| H      | -1.5733730 | -2.2529040 | 2.4945980  |

TM<sup>-</sup>

E = -919.91448765 hartrees

| Symbol | X          | Y          | Z          |
|--------|------------|------------|------------|
| C      | -2.3707790 | -0.0000090 | -1.4782650 |
| C      | -1.1579160 | -0.0000050 | -0.6882330 |
| C      | -1.1579160 | -0.0000050 | 0.6882330  |
| C      | -2.3707790 | -0.0000100 | 1.4782650  |
| C      | -3.5918600 | -0.0000100 | 0.6868920  |
| C      | -3.5918600 | -0.0000110 | -0.6868920 |
| C      | 0.2472270  | 0.0000000  | -1.2967660 |
| C      | 0.2472270  | 0.0000010  | 1.2967660  |
| C      | 1.5593100  | -2.2582260 | -1.4048720 |
| C      | 2.1616010  | -3.3121030 | -0.6980790 |
| C      | 2.1616010  | -3.3121030 | 0.6980820  |
| C      | 1.5593100  | -2.2582250 | 1.4048740  |
| C      | 0.9606480  | -1.2160430 | 0.7048050  |
| C      | 0.9606480  | -1.2160440 | -0.7048040 |
| C      | 1.5592930  | 2.2582350  | -1.4048730 |
| C      | 2.1615760  | 3.3121170  | -0.6980820 |
| C      | 2.1615760  | 3.3121180  | 0.6980790  |
| C      | 1.5592930  | 2.2582360  | 1.4048720  |
| C      | 0.9606380  | 1.2160490  | 0.7048040  |
| C      | 0.9606390  | 1.2160490  | -0.7048050 |
| O      | -2.3720440 | -0.0000090 | -2.7487060 |
| O      | -2.3720440 | -0.0000020 | 2.7487060  |
| H      | -4.5264280 | -0.0000130 | 1.2447640  |
| H      | -4.5264280 | -0.0000140 | -1.2447640 |
| H      | 0.2148180  | -0.0000010 | -2.3873780 |
| H      | 0.2148180  | 0.0000010  | 2.3873780  |
| H      | 2.6247020  | -4.1320500 | -1.2417240 |
| H      | 2.6247020  | -4.1320490 | 1.2417270  |
| H      | 2.6246720  | 4.1320660  | -1.2417270 |
| H      | 2.6246720  | 4.1320670  | 1.2417240  |
| H      | 1.5500890  | -2.2603910 | -2.4923390 |
| H      | 1.5500890  | -2.2603890 | 2.4923410  |
| H      | 1.5500720  | 2.2603990  | -2.4923400 |
| H      | 1.5500720  | 2.2604010  | 2.4923390  |



TM<sup>2-</sup>

E = -919.82356691 hartrees

| Symbol | X          | Y          | Z          |
|--------|------------|------------|------------|
| C      | 2.3188220  | -0.0000430 | 1.5123060  |
| C      | 1.1422810  | -0.0000220 | 0.7056820  |
| C      | 1.1422810  | -0.0000220 | -0.7056820 |
| C      | 2.3188220  | -0.0000450 | -1.5123060 |
| C      | 3.5114010  | -0.0000560 | -0.6990380 |
| C      | 3.5114010  | -0.0000560 | 0.6990380  |
| C      | -0.2752440 | 0.0000030  | 1.2986980  |
| C      | -0.2752440 | 0.0000040  | -1.2986980 |
| C      | -1.5252240 | -2.2928030 | 1.4027930  |
| C      | -2.0859440 | -3.3738350 | 0.6993300  |
| C      | -2.0859440 | -3.3738340 | -0.6993330 |
| C      | -1.5252250 | -2.2928020 | -1.4027950 |
| C      | -0.9704390 | -1.2203800 | -0.7086760 |
| C      | -0.9704380 | -1.2203810 | 0.7086750  |
| C      | -1.5251420 | 2.2928540  | 1.4027950  |
| C      | -2.0858220 | 3.3739060  | 0.6993330  |
| C      | -2.0858220 | 3.3739070  | -0.6993300 |
| C      | -1.5251410 | 2.2928550  | -1.4027930 |
| C      | -0.9703940 | 1.2204120  | -0.7086750 |
| C      | -0.9703950 | 1.2204110  | 0.7086760  |
| O      | 2.3265310  | -0.0000400 | 2.8165770  |
| O      | 2.3265310  | -0.0000330 | -2.8165770 |
| H      | 4.4634380  | -0.0000650 | -1.2357620 |
| H      | 4.4634380  | -0.0000660 | 1.2357620  |
| H      | -0.2392030 | 0.0000020  | 2.3907960  |
| H      | -0.2392030 | 0.0000030  | -2.3907960 |
| H      | -2.5145240 | -4.2132570 | 1.2454170  |
| H      | -2.5145240 | -4.2132560 | -1.2454200 |
| H      | -2.5143710 | 4.2133430  | 1.2454200  |
| H      | -2.5143710 | 4.2133440  | -1.2454170 |
| H      | -1.5067190 | -2.2977710 | 2.4912650  |
| H      | -1.5067200 | -2.2977690 | -2.4912670 |
| H      | -1.5066360 | 2.2978200  | 2.4912670  |
| H      | -1.5066360 | 2.2978220  | -2.4912650 |



# TT

E = -1218.23840156 hartrees

| Symbol | X          | Y          | Z          |
|--------|------------|------------|------------|
| C      | -1.7229810 | 2.0216740  | -1.4599640 |
| C      | -0.9070840 | 1.0656760  | -0.6744610 |
| C      | -0.9070840 | 1.0656860  | 0.6744440  |
| C      | -1.7229990 | 2.0216800  | 1.4599320  |
| C      | -2.5446790 | 2.9837440  | 0.6722040  |
| C      | -2.5446810 | 2.9837320  | -0.6722510 |
| C      | 0.0007050  | 0.0003890  | -1.2998030 |
| C      | 0.0007080  | 0.0004120  | 1.2998030  |
| C      | -0.8903910 | -2.5021320 | -1.4598650 |
| C      | -1.3151590 | -3.6939770 | -0.6721980 |
| C      | -1.3151580 | -3.6939640 | 0.6722690  |
| C      | -0.8903840 | -2.5021060 | 1.4599140  |
| C      | -0.4681390 | -1.3183130 | 0.6744610  |
| C      | -0.4681410 | -1.3183250 | -0.6744360 |
| C      | 2.6134350  | 0.4804750  | -1.4599150 |
| C      | 3.8580480  | 0.7081750  | -0.6722470 |
| C      | 3.8580500  | 0.7081870  | 0.6722230  |
| C      | 2.6134470  | 0.4804590  | 1.4598980  |
| C      | 1.3772510  | 0.2535970  | 0.6744450  |
| C      | 1.3772480  | 0.2535900  | -0.6744540 |
| O      | -1.7287100 | 2.0282300  | -2.6852630 |
| O      | -1.7286630 | 2.0283110  | 2.6852310  |
| O      | -0.8935630 | -2.5101760 | -2.6851730 |
| O      | -0.8935620 | -2.5101250 | 2.6852220  |
| O      | 2.6217760  | 0.4826720  | -2.6852250 |
| O      | 2.6217700  | 0.4827920  | 2.6852090  |
| H      | -3.1394150 | 3.6804540  | 1.2555440  |
| H      | -3.1394230 | 3.6804290  | -1.2556010 |
| H      | 0.0008660  | 0.0004340  | -2.3880000 |
| H      | 0.0008730  | 0.0004750  | 2.3880000  |
| H      | -1.6227700 | -4.5568000 | -1.2555690 |
| H      | -1.6227670 | -4.5567760 | 1.2556580  |
| H      | 4.7590940  | 0.8730820  | -1.2556340 |
| H      | 4.7590970  | 0.8731110  | 1.2556040  |

**TT<sup>-</sup>**

E = -1218.34863408 hartrees

| Symbol | X          | Y          | Z          |
|--------|------------|------------|------------|
| C      | 0.0001110  | -2.5937480 | -1.4684020 |
| C      | 0.0000190  | -1.3596520 | -0.6823630 |
| C      | 0.0000580  | -1.3596120 | 0.6824480  |
| C      | 0.0001200  | -2.5936600 | 1.4685630  |
| C      | -0.0006880 | -3.8438020 | 0.6765920  |
| C      | -0.0007440 | -3.8438430 | -0.6763560 |
| C      | -0.0000270 | 0.0503150  | -1.2973060 |
| C      | 0.0000590  | 0.0503920  | 1.2973040  |
| C      | 2.3311040  | 1.2926290  | -1.4636500 |
| C      | 3.4431710  | 1.8750160  | -0.6754650 |
| C      | 3.4432160  | 1.8750590  | 0.6751150  |
| C      | 2.3312040  | 1.2927160  | 1.4634100  |
| C      | 1.2260960  | 0.7228710  | 0.6807060  |
| C      | 1.2260510  | 0.7228290  | -0.6808370 |
| C      | -2.3312260 | 1.2925060  | -1.4634910 |
| C      | -3.4425830 | 1.8761490  | -0.6752300 |
| C      | -3.4425380 | 1.8761880  | 0.6753490  |
| C      | -2.3312110 | 1.2924370  | 1.4635710  |
| C      | -1.2260510 | 0.7227990  | 0.6807940  |
| C      | -1.2260840 | 0.7227810  | -0.6807530 |
| O      | -0.0006980 | -2.6193350 | -2.7109510 |
| O      | -0.0002530 | -2.6191720 | 2.7111130  |
| O      | 2.3537790  | 1.3046600  | -2.7020900 |
| O      | 2.3539530  | 1.3048370  | 2.7018480  |
| O      | -2.3535530 | 1.3053660  | -2.7019270 |
| O      | -2.3532290 | 1.3058080  | 2.7020070  |
| H      | -0.0012020 | -4.7659120 | 1.2522280  |
| H      | -0.0013200 | -4.7659870 | -1.2519360 |
| H      | -0.0000620 | 0.0490070  | -2.3850540 |
| H      | 0.0000960  | 0.0491470  | 2.3850510  |
| H      | 4.2654230  | 2.2875160  | -1.2542570 |
| H      | 4.2655050  | 2.2875950  | 1.2538260  |
| H      | -4.2644410 | 2.2895080  | -1.2539680 |
| H      | -4.2643480 | 2.2896010  | 1.2541180  |

TT<sup>2-</sup>

E = -1218.32809584 hartrees

| Symbol | X          | Y          | Z          |
|--------|------------|------------|------------|
| C      | -0.0000170 | 2.5515400  | -1.4758740 |
| C      | 0.0000040  | 1.3292120  | -0.6890250 |
| C      | -0.0000130 | 1.3291840  | 0.6890820  |
| C      | -0.0000060 | 2.5514800  | 1.4759820  |
| C      | -0.0001370 | 3.7924280  | 0.6798920  |
| C      | -0.0001070 | 3.7924560  | -0.6797340 |
| C      | 0.0000270  | -0.0894950 | -1.2948520 |
| C      | -0.0000190 | -0.0895460 | 1.2948490  |
| C      | -2.3531240 | -1.2687270 | -1.4711920 |
| C      | -3.4661820 | -1.8190530 | -0.6802640 |
| C      | -3.4662070 | -1.8190800 | 0.6800630  |
| C      | -2.3531800 | -1.2687800 | 1.4710520  |
| C      | -1.2414120 | -0.7394290 | 0.6873310  |
| C      | -1.2413870 | -0.7394040 | -0.6874090 |
| C      | 2.3531770  | -1.2687490 | -1.4711070 |
| C      | 3.4663160  | -1.8188620 | -0.6801390 |
| C      | 3.4662920  | -1.8188890 | 0.6801890  |
| C      | 2.3531750  | -1.2687090 | 1.4711390  |
| C      | 1.2414100  | -0.7394070 | 0.6873780  |
| C      | 1.2414250  | -0.7393940 | -0.6873620 |
| O      | 0.0000320  | 2.5960040  | -2.7311310 |
| O      | -0.0002090 | 2.5958930  | 2.7312400  |
| O      | -2.3884420 | -1.2862010 | -2.7252150 |
| O      | -2.3885380 | -1.2863120 | 2.7250740  |
| O      | 2.3886580  | -1.2859750 | -2.7251300 |
| O      | 2.3884790  | -1.2862620 | 2.7251620  |
| H      | -0.0002290 | 4.7194440  | 1.2510860  |
| H      | -0.0001640 | 4.7194950  | -1.2508900 |
| H      | 0.0000460  | -0.0874020 | -2.3824130 |
| H      | -0.0000370 | -0.0874950 | 2.3824090  |
| H      | -4.3111480 | -2.1985980 | -1.2523720 |
| H      | -4.3111940 | -2.1986470 | 1.2521250  |
| H      | 4.3113580  | -2.1982850 | -1.2522150 |
| H      | 4.3113090  | -2.1983480 | 1.2522790  |

**TT<sup>3-</sup>**

E = -1218.22549473 hartrees

| Symbol | X          | Y          | Z          |
|--------|------------|------------|------------|
| C      | 0.0137780  | 2.6380420  | -1.4772750 |
| C      | 0.0072650  | 1.4131740  | -0.6903690 |
| C      | 0.0072690  | 1.4131790  | 0.6903560  |
| C      | 0.0137740  | 2.6380550  | 1.4772520  |
| C      | 0.0202190  | 3.8590230  | 0.6881530  |
| C      | 0.0202130  | 3.8590170  | -0.6881860 |
| C      | -0.0000880 | -0.0052450 | -1.2891900 |
| C      | -0.0000780 | -0.0052340 | 1.2891910  |
| C      | -2.3004400 | -1.3069880 | -1.4771590 |
| C      | -3.3643480 | -1.9056370 | -0.6882450 |
| C      | -3.3643430 | -1.9056300 | 0.6882900  |
| C      | -2.3004290 | -1.3069750 | 1.4771890  |
| C      | -1.2331900 | -0.7052670 | 0.6902880  |
| C      | -1.2331950 | -0.7052740 | -0.6902710 |
| C      | 2.2866430  | -1.3307890 | -1.4771730 |
| C      | 3.3443050  | -1.9404130 | -0.6882720 |
| C      | 3.3443100  | -1.9404090 | 0.6882610  |
| C      | 2.2866400  | -1.3308020 | 1.4771650  |
| C      | 1.2256900  | -0.7180580 | 0.6902760  |
| C      | 1.2256870  | -0.7180590 | -0.6902800 |
| O      | 0.0140280  | 2.6789970  | -2.7511810 |
| O      | 0.0140810  | 2.6790200  | 2.7511570  |
| O      | -2.3353690 | -1.3279250 | -2.7511370 |
| O      | -2.3353500 | -1.3278960 | 2.7511690  |
| O      | 2.3213770  | -1.3520200 | -2.7511530 |
| O      | 2.3214210  | -1.3519600 | 2.7511450  |
| H      | 0.0251120  | 4.7932330  | 1.2523920  |
| H      | 0.0250990  | 4.7932230  | -1.2524330 |
| H      | -0.0001080 | -0.0055740 | -2.3766980 |
| H      | -0.0000890 | -0.0055550 | 2.3766980  |
| H      | -4.1794400 | -2.3622410 | -1.2523880 |
| H      | -4.1794310 | -2.3622280 | 1.2524430  |
| H      | 4.1546250  | -2.4054280 | -1.2524200 |
| H      | 4.1546350  | -2.4054170 | 1.2524060  |

**TT<sup>4-</sup>**

E = -1217.94034905 hartrees

| Symbol | X          | Y          | Z          |
|--------|------------|------------|------------|
| C      | -0.0275220 | 2.6409440  | 1.4891710  |
| C      | -0.0147290 | 1.4229560  | 0.6982930  |
| C      | -0.0147360 | 1.4229620  | -0.6982800 |
| C      | -0.0275270 | 2.6409570  | -1.4891470 |
| C      | -0.0402650 | 3.8542660  | -0.6930050 |
| C      | -0.0402530 | 3.8542610  | 0.6930380  |
| C      | 0.0000780  | -0.0020280 | 1.2868040  |
| C      | 0.0000650  | -0.0020180 | -1.2868040 |
| C      | 2.3045000  | -1.2967910 | 1.4891820  |
| C      | 3.3634950  | -1.8887690 | 0.6930320  |
| C      | 3.3634890  | -1.8887610 | -0.6930860 |
| C      | 2.3044870  | -1.2967740 | -1.4892200 |
| C      | 1.2420270  | -0.7011450 | -0.6982910 |
| C      | 1.2420330  | -0.7011540 | 0.6982700  |
| C      | -2.2769330 | -1.3444330 | 1.4892040  |
| C      | -3.3234170 | -1.9582720 | 0.6930680  |
| C      | -3.3234230 | -1.9582680 | -0.6930470 |
| C      | -2.2769310 | -1.3444530 | -1.4891890 |
| C      | -1.2270790 | -0.7268550 | -0.6982760 |
| C      | -1.2270760 | -0.7268520 | 0.6982840  |
| O      | -0.0281530 | 2.6989620  | 2.7764060  |
| O      | -0.0282270 | 2.6989850  | -2.7763820 |
| O      | 2.3547220  | -1.3258450 | 2.7765050  |
| O      | 2.3546980  | -1.3258120 | -2.7765430 |
| O      | -2.3265740 | -1.3744500 | 2.7765270  |
| O      | -2.3266250 | -1.3743910 | -2.7765120 |
| H      | -0.0500990 | 4.7952000  | -1.2528600 |
| H      | -0.0500760 | 4.7951900  | 1.2529010  |
| H      | 0.0001080  | -0.0023410 | 2.3747250  |
| H      | 0.0000820  | -0.0023220 | -2.3747250 |
| H      | 4.1850110  | -2.3477710 | 1.2527790  |
| H      | 4.1850000  | -2.3477560 | -1.2528460 |
| H      | -4.1352200 | -2.4342300 | 1.2528220  |
| H      | -4.1352340 | -2.4342180 | -1.2527960 |



TT<sup>5-</sup>

E = -1217.59790992 hartrees

| Symbol | X          | Y          | Z          |
|--------|------------|------------|------------|
| C      | 0.8094890  | 2.5303760  | 1.4750350  |
| C      | 0.4404870  | 1.3587590  | 0.6922780  |
| C      | 0.4392160  | 1.3590500  | -0.6925090 |
| C      | 0.8270320  | 2.5244440  | -1.4754650 |
| C      | 1.2037810  | 3.6887990  | -0.6903070 |
| C      | 1.1875650  | 3.6941670  | 0.6896740  |
| C      | -0.0001470 | -0.0000270 | 1.2831360  |
| C      | -0.0001820 | -0.0002380 | -1.2831410 |
| C      | 1.7868680  | -1.9659740 | 1.4753970  |
| C      | 2.6066570  | -2.8745750 | 0.6902000  |
| C      | 2.5939460  | -2.8861520 | -0.6897850 |
| C      | 1.7730580  | -1.9786540 | -1.4751180 |
| C      | 0.9573710  | -1.0602670 | -0.6923230 |
| C      | 0.9564210  | -1.0610250 | 0.6924690  |
| C      | -2.5964140 | -0.5639990 | 1.4753120  |
| C      | -3.7933090 | -0.8189210 | 0.6901050  |
| C      | -3.7968740 | -0.8024310 | -0.6898760 |
| C      | -2.6002830 | -0.5463150 | -1.4751610 |
| C      | -1.3970540 | -0.2993420 | -0.6923550 |
| C      | -1.3973110 | -0.2979390 | 0.6924280  |
| O      | 0.8107640  | 2.5716520  | 2.7588080  |
| O      | 0.8498060  | 2.5585370  | -2.7592500 |
| O      | 1.8217640  | -1.9876650 | 2.7591850  |
| O      | 1.7910460  | -2.0157990 | -2.7588980 |
| O      | -2.6327240 | -0.5830450 | 2.7591050  |
| O      | -2.6413140 | -0.5436400 | -2.7589490 |
| H      | 1.4884320  | 4.5904340  | -1.2362600 |
| H      | 1.4863470  | 4.5913070  | 1.2354810  |
| H      | -0.0000260 | 0.0000060  | 2.3708990  |
| H      | -0.0000750 | -0.0003660 | -2.3709050 |
| H      | 3.2349620  | -3.5811260 | 1.2361470  |
| H      | 3.2332470  | -3.5828490 | -1.2356300 |
| H      | -4.7195230 | -1.0089940 | 1.2360060  |
| H      | -4.7200000 | -1.0071460 | -1.2357150 |

**TT<sup>6-</sup>**

E = -1217.13918692 hartrees

| Symbol | X          | Y          | Z          |
|--------|------------|------------|------------|
| C      | -1.6945190 | -2.0597910 | -1.4874880 |
| C      | -0.9036870 | -1.1211960 | -0.6975650 |
| C      | -0.8948490 | -1.1282240 | 0.6975640  |
| C      | -1.6400100 | -2.1034680 | 1.4874630  |
| C      | -2.3980160 | -3.0490460 | 0.6974290  |
| C      | -2.4565000 | -3.0020200 | -0.6973830 |
| C      | -0.0000600 | 0.0002670  | -1.2805180 |
| C      | 0.0019440  | -0.0012580 | 1.2805490  |
| C      | 2.6319820  | -0.4332000 | -1.4896530 |
| C      | 3.8300810  | -0.6191940 | -0.7005860 |
| C      | 3.8420430  | -0.5482380 | 0.6943580  |
| C      | 2.6439840  | -0.3707480 | 1.4854020  |
| C      | 1.4262090  | -0.2129340 | 0.6964270  |
| C      | 1.4236630  | -0.2217290 | -0.6987310 |
| C      | -0.9414700 | 2.4961520  | -1.4854260 |
| C      | -1.3800400 | 3.6252210  | -0.6944560 |
| C      | -1.4458370 | 3.5982360  | 0.7005760  |
| C      | -0.9995280 | 2.4709230  | 1.4896960  |
| C      | -0.5270820 | 1.3388580  | 0.6987750  |
| C      | -0.5193810 | 1.3430840  | -0.6964040 |
| O      | -1.7507580 | -2.0733630 | -2.7855960 |
| O      | -1.6397140 | -2.1624760 | 2.7855100  |
| O      | 2.6711090  | -0.4733280 | -2.7878350 |
| O      | 2.6951210  | -0.3457110 | 2.7835410  |
| O      | -0.9269430 | 2.5520710  | -2.7835410 |
| O      | -1.0464170 | 2.5006590  | 2.7879170  |
| H      | -3.0230600 | -3.7635630 | 1.2416010  |
| H      | -3.0206840 | -3.7655380 | -1.2415010 |
| H      | -0.0006110 | 0.0007700  | -2.3686380 |
| H      | 0.0029440  | -0.0021770 | 2.3686750  |
| H      | 4.7734290  | -0.7216390 | -1.2454420 |
| H      | 4.7742570  | -0.7302460 | 1.2376230  |
| H      | -1.7643970 | 4.4937930  | -1.2377520 |
| H      | -1.7546190 | 4.4956090  | 1.2452760  |
